# Supplementary material
Source: PubMed Central journal article supplement (PMC3529640)
Supplement: NIHMS425602-supplement-1.pdf [file NIHMS425602-supplement-1.pdf]

## Supplementary Figure S1

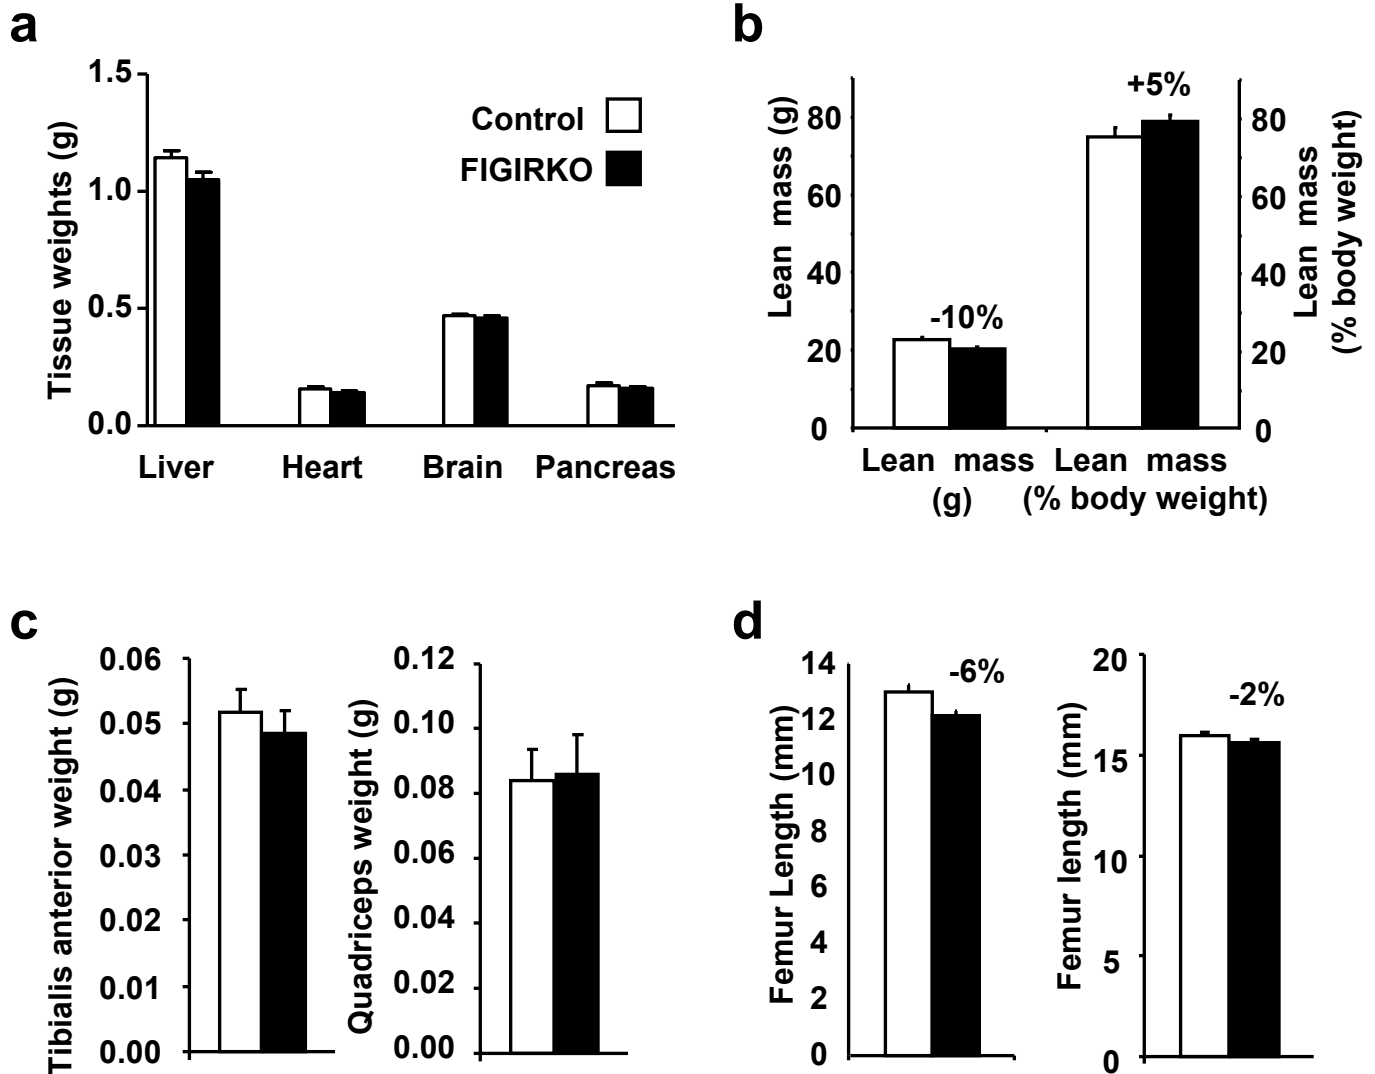

### Supplementary Figure S1: Tissue weights and bone length of 4 month old control and FIGIRKO male mice

(a) Liver, heart, brain and pancreas weight from 4 months old control and FIGIRKO male mice. Results are mean  $\pm$  SEM of 15 animals/group for liver and 6 animals/group for heart, brain and pancreas.

(b) Lean mass measured by DEXA scans from 4 months old control and FIGIRKO male mice. Results are mean  $\pm$  SEM of 6 animals/group.

(c) Skeletal muscle weights from 4 months old control and FIGIRKO male mice. Results are mean  $\pm$  SEM of 10 animals/group.

(d) Femur length measured by DEXA scans (left, n=6) or by dissection (right, n=10) from 4 months old control and FIGIRKO male mice.

## Supplementary Figure S2

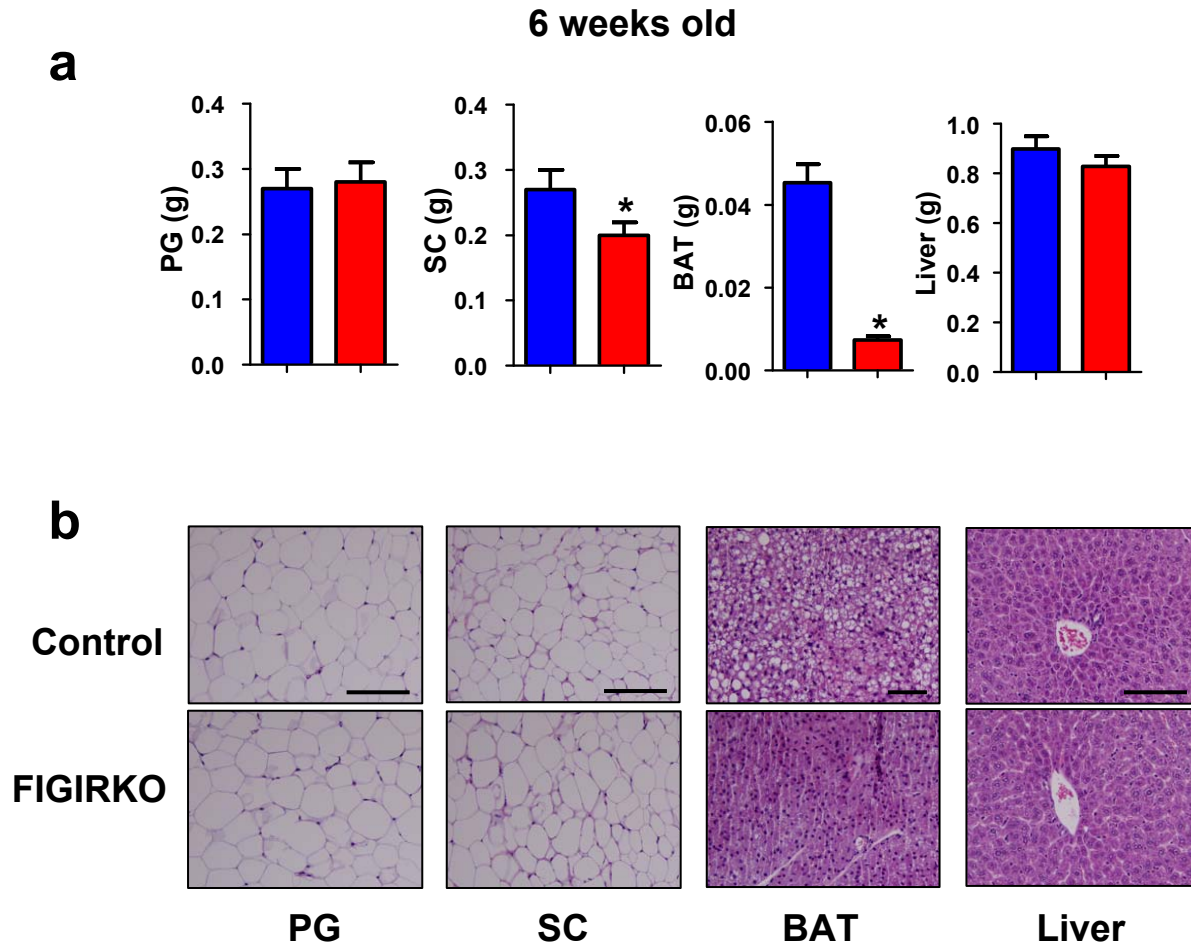

### Supplementary Figure S2: Body weight, tissue weights and histology of 6 week-old control and FIGIRKO male mice

(a) Perigonadal (PG), inguinal subcutaneous (SC), brown adipose tissue (BAT) and liver weights in 6 weeks old control and FIGIRKO male mice. Results are mean  $\pm$  SEM of 6 animals/group.

(b) Hematoxylin and eosin stained sections of adipose tissues and liver from 6 weeks old control and FIGIRKO male mice. Scale bar = 100 $\mu$ m.

Statistical significance assessed by two-tailed Student's t test, \*  $p < 0.05$  between control and FIGIRKO mice.

## Supplementary Figure S3

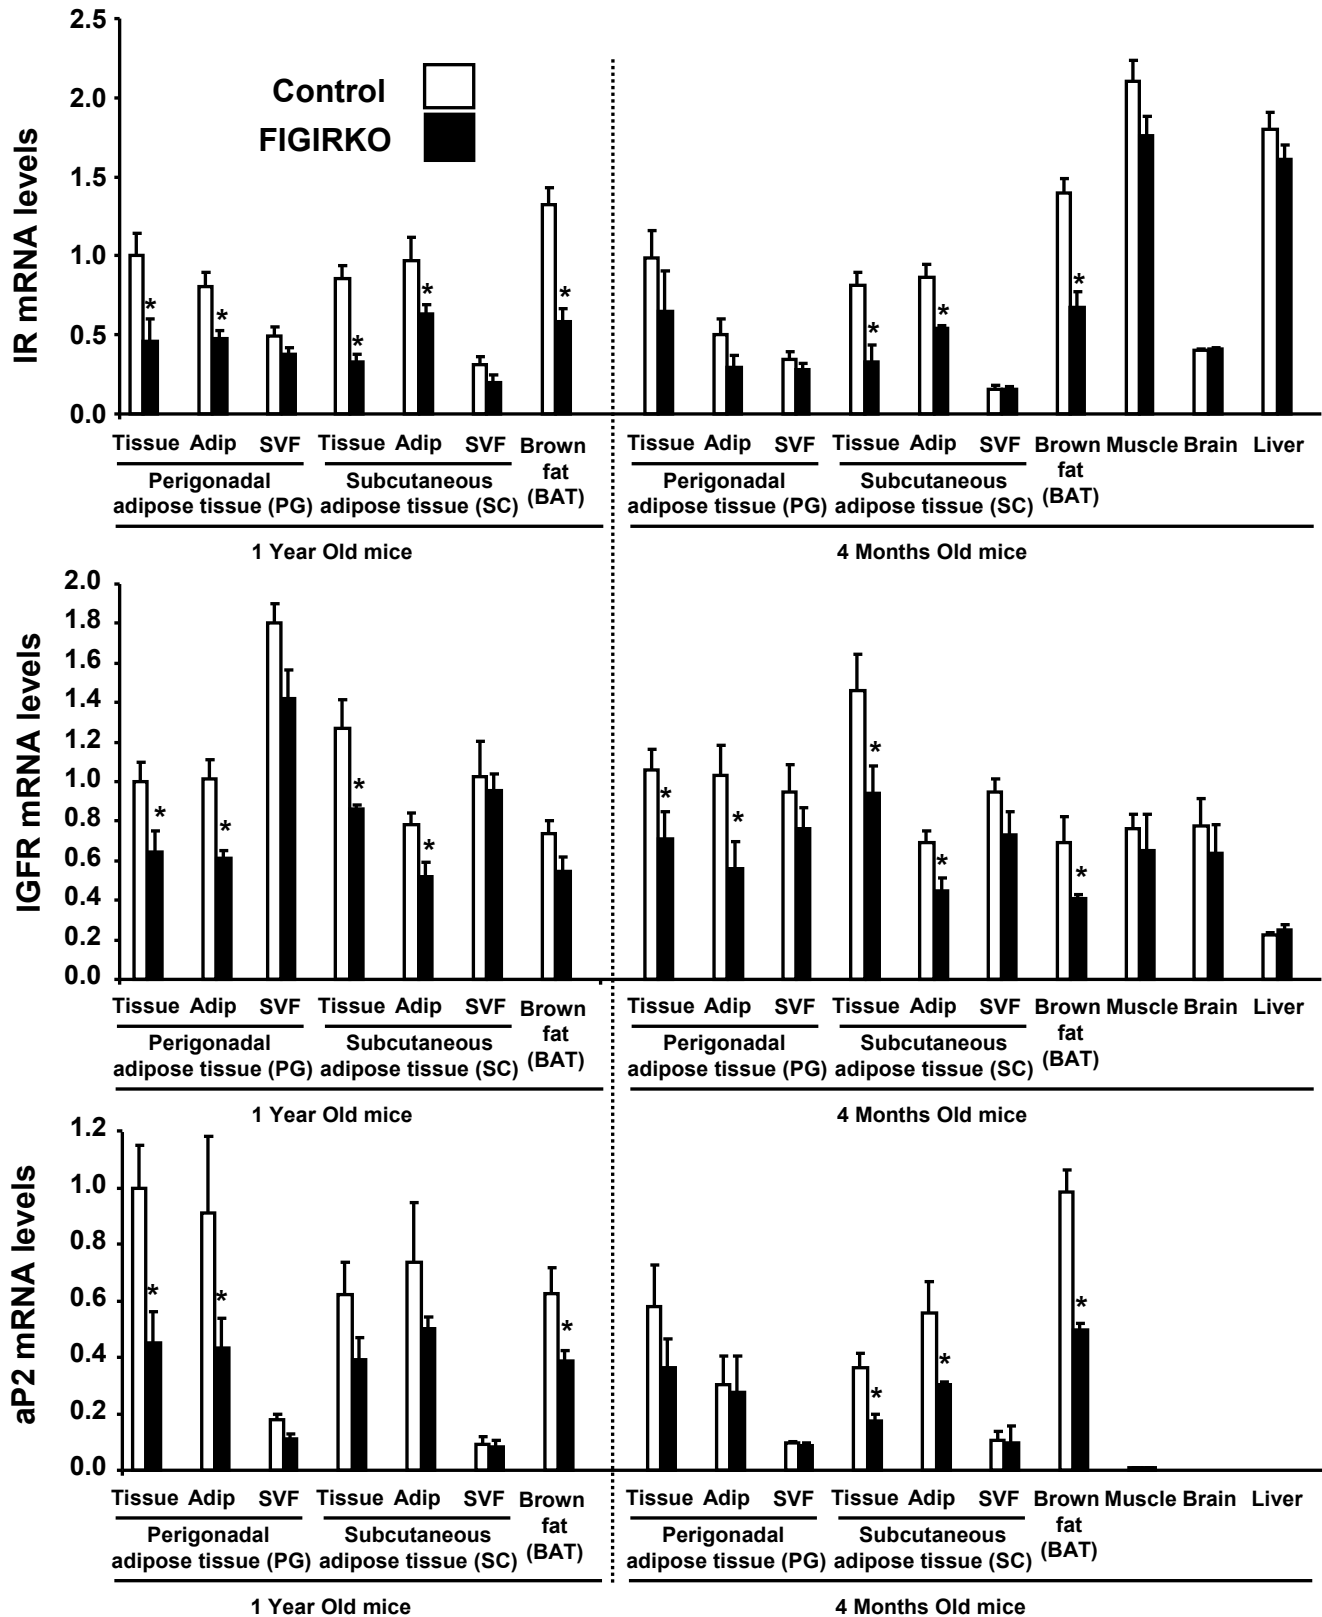

### Supplementary Figure S3: IR and IGF1R expression in control and FIGIRKO tissues

IR, IGF1R and aP2 mRNA abundance was measured by real time PCR in intact adipose tissues, isolated adipocytes and stroma vascular fraction as well as skeletal muscle (gastrocnemius), brain and liver from 4 months old or 1 year old male control and FIGIRKO mice on a standard chow diet. Results are mean  $\pm$  SEM of 5-6 animals/group. Statistical significance assessed by two-tailed Student's t test, \*  $p < 0.05$  between control and FIGIRKO mice.

## Supplementary Figure S4

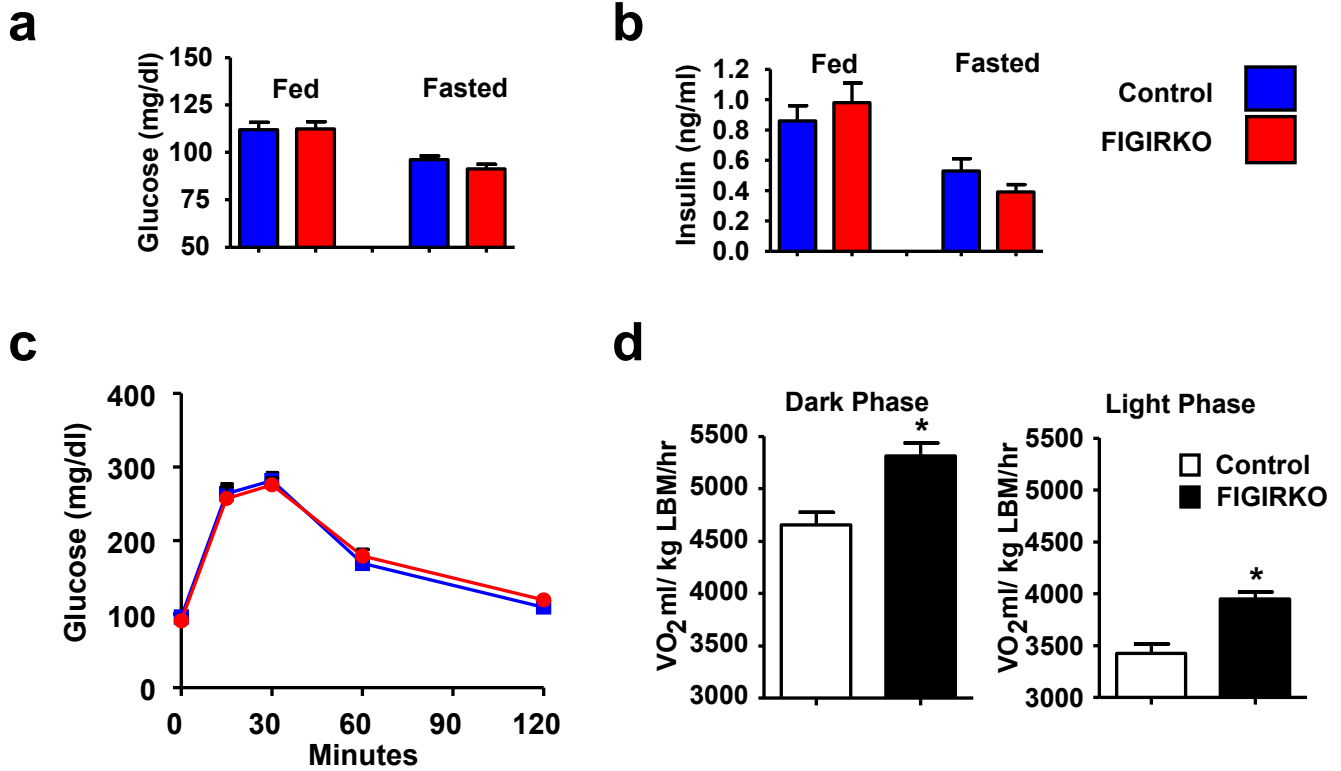

### Supplementary Figure S4: Glucose and insulin levels, glucose tolerance test and oxygen consumption in control and FIGIRKO mice

(a) Fed and fasted plasma glucose and (b) Insulin levels in 4 months old control and FIGIRKO male mice. Results are mean  $\pm$  SEM of 7-8 animals/group. (c) Intraperitoneal glucose tolerance test in 4 months old control and FIGIRKO male mice. Results are mean  $\pm$  SEM of 7-8 animals/group. (d) Oxygen consumption (VO<sub>2</sub>) was measured by indirect calorimetry in 6 months old control and FIGIRKO male mice. Results are expressed per kg of lean body mass per hour and are mean  $\pm$  SEM of 10 animals/group. Statistical significance assessed by two-tailed Student's t test, \*  $p < 0.05$  between control and FIGIRKO mice.

# Supplementary Figure S5

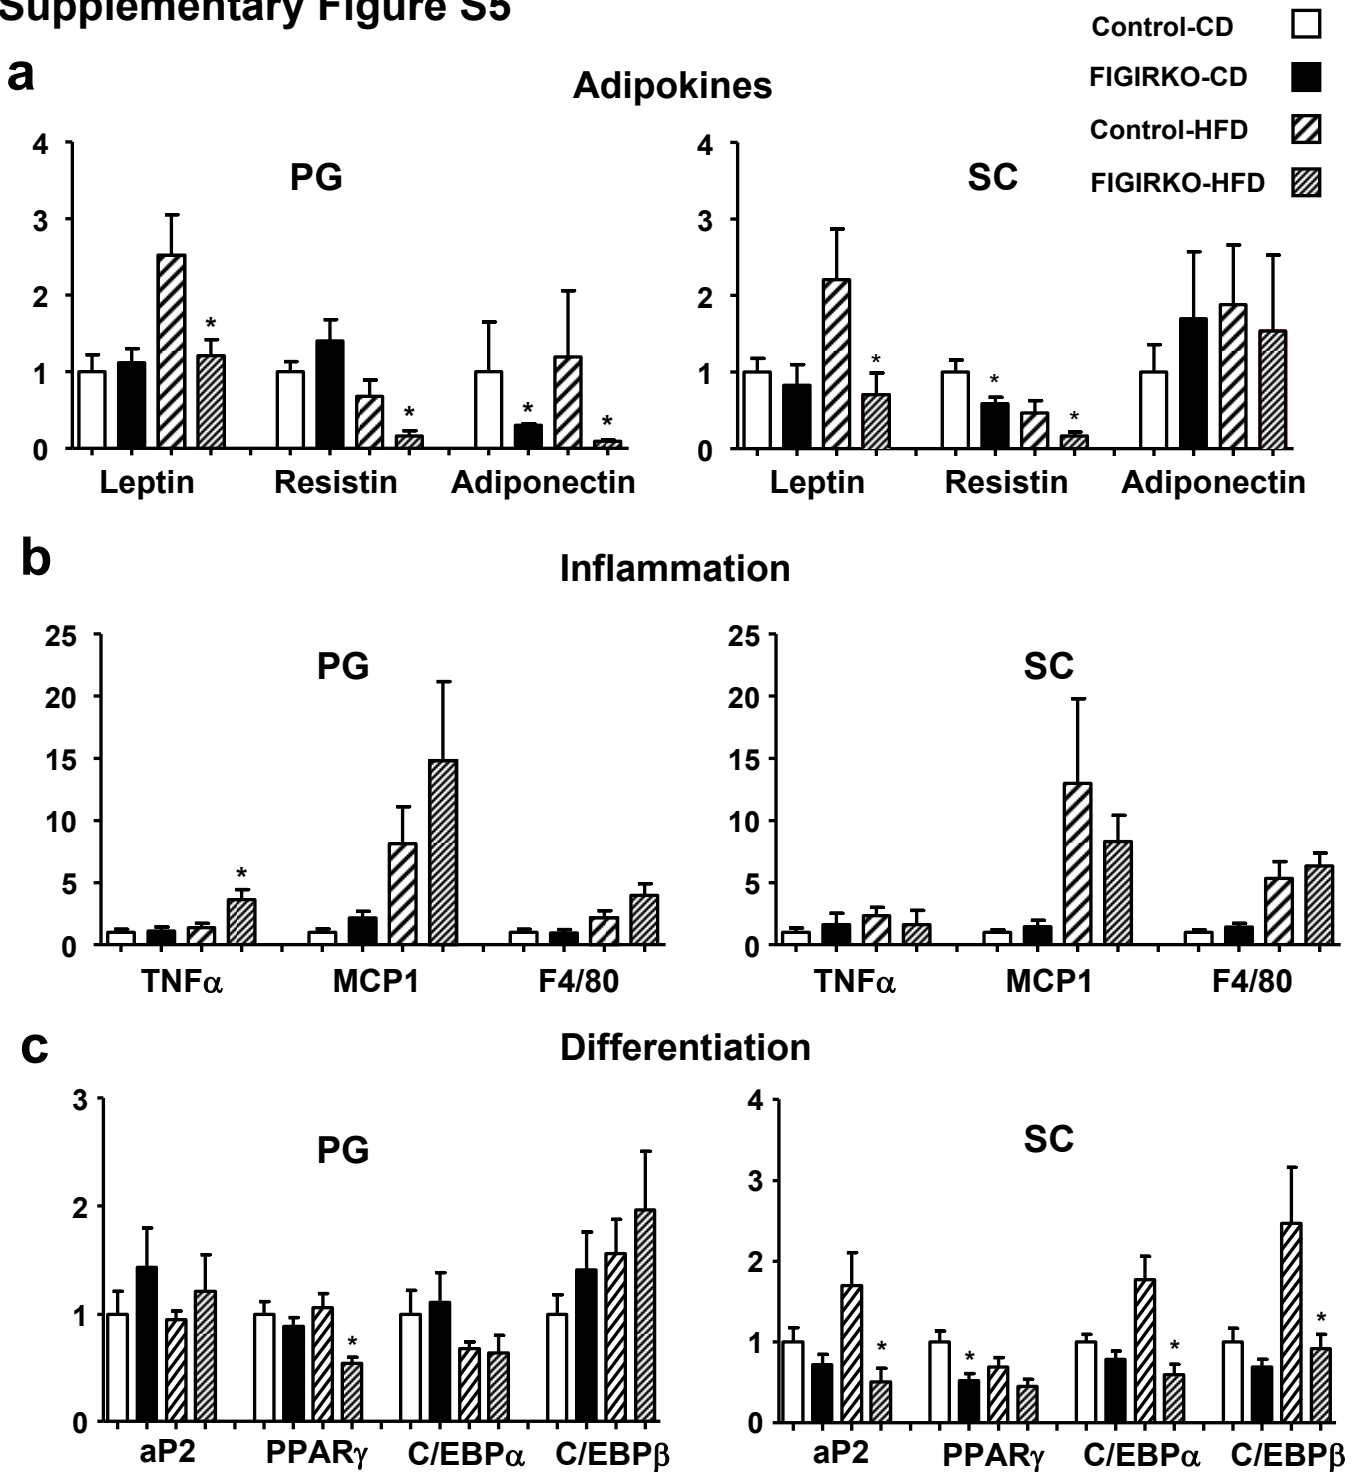

## Supplementary Figure S5: Expression of adipokines, inflammation and differentiation markers in white adipose tissues of control and FIGIRKO mice

(a) *Leptin*, *resistin* and *adiponectin* mRNA abundance was measured by real time PCR in PG and SC WAT from control and FIGIRKO male mice fed either a chow or a high fat diet.

(b) *TNFα*, *MCP1* and *F4/80* mRNA abundance was measured by real time PCR in PG and SC WAT from control and FIGIRKO male mice fed either a chow or a high fat diet.

(c) *aP2*, *PPARγ*, *C/EBPα* and *β* mRNA abundance was measured by real time PCR in PG and SC WAT from control and FIGIRKO male mice fed either a chow or a high fat diet.

Results are mean ± SEM of 6 animals/group. Statistical significance assessed by two-tailed Student's t test, \*  $p < 0.05$  between control and FIGIRKO mice.

## Supplementary Figure S6

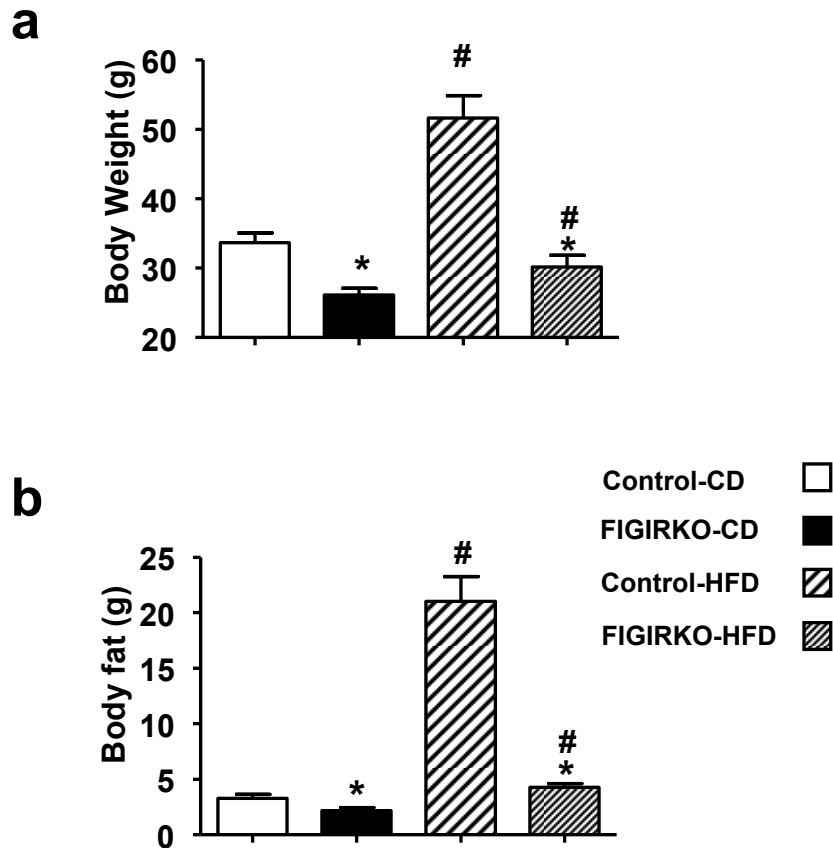

### Supplementary Figure S6: Body weight and percent body fat in chow diet or high fat diet fed 1 year old control and FIGIRKO male mice

(a) Body weight assessed in 10 months old control and FIGIRKO male mice fed a chow diet or high fat diet for 4 months. Results are mean  $\pm$  SEM of 6 animals/group.

(b) Body fat content assessed by nuclear magnetic resonance in 10 months old control and FIGIRKO male mice fed a chow diet or high fat diet for 4 months. Results are mean  $\pm$  SEM of 6 animals/group.

Statistical significance assessed by two-tailed Student's t test, \*  $p < 0.05$  between control and FIGIRKO mice, #  $p < 0.05$  between CD and HFD.

## Supplementary Figure S7

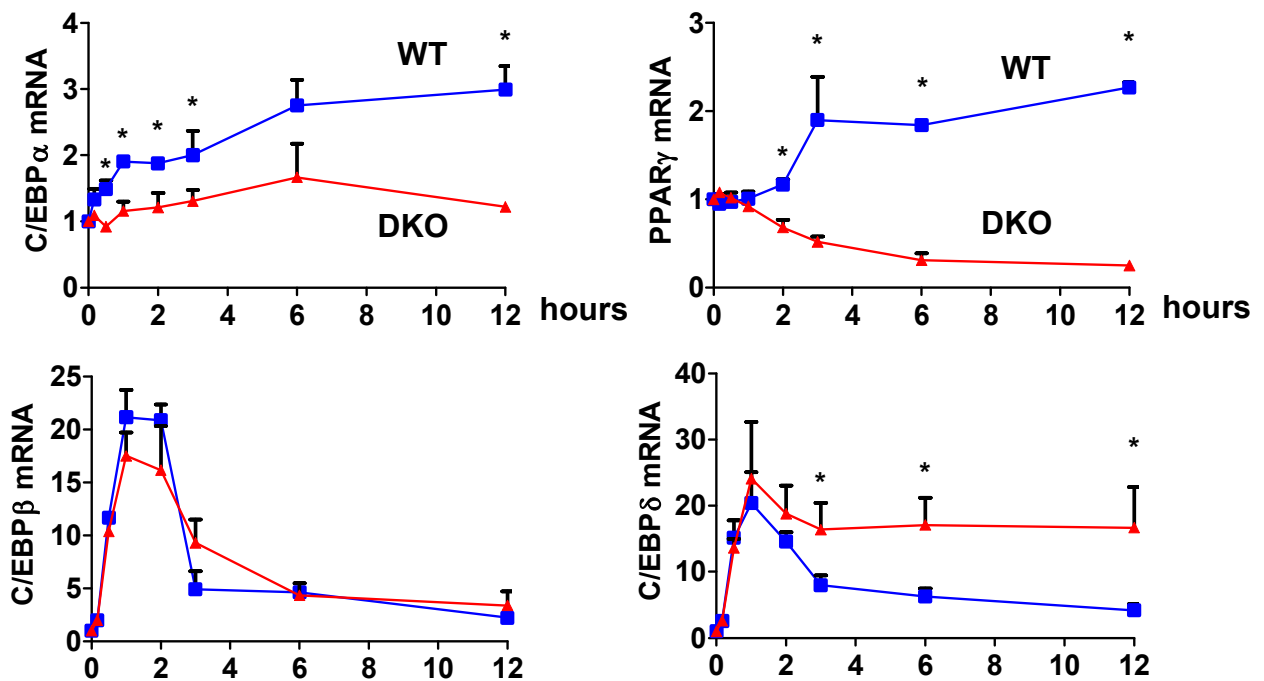

### Supplementary Figure S7: Expression pattern of transcription factors during the first 12 hours of adipocyte differentiation

mRNA abundance was measured by real time PCR in WT and DKO cells during the first 12 hours of induction of the differentiation. Results are mean  $\pm$  SEM of 3 independent experiments. Statistical significance assessed by two-tailed Student's t test, \*  $p < 0.05$  between WT and DKO cells.

## Supplementary Figure S8

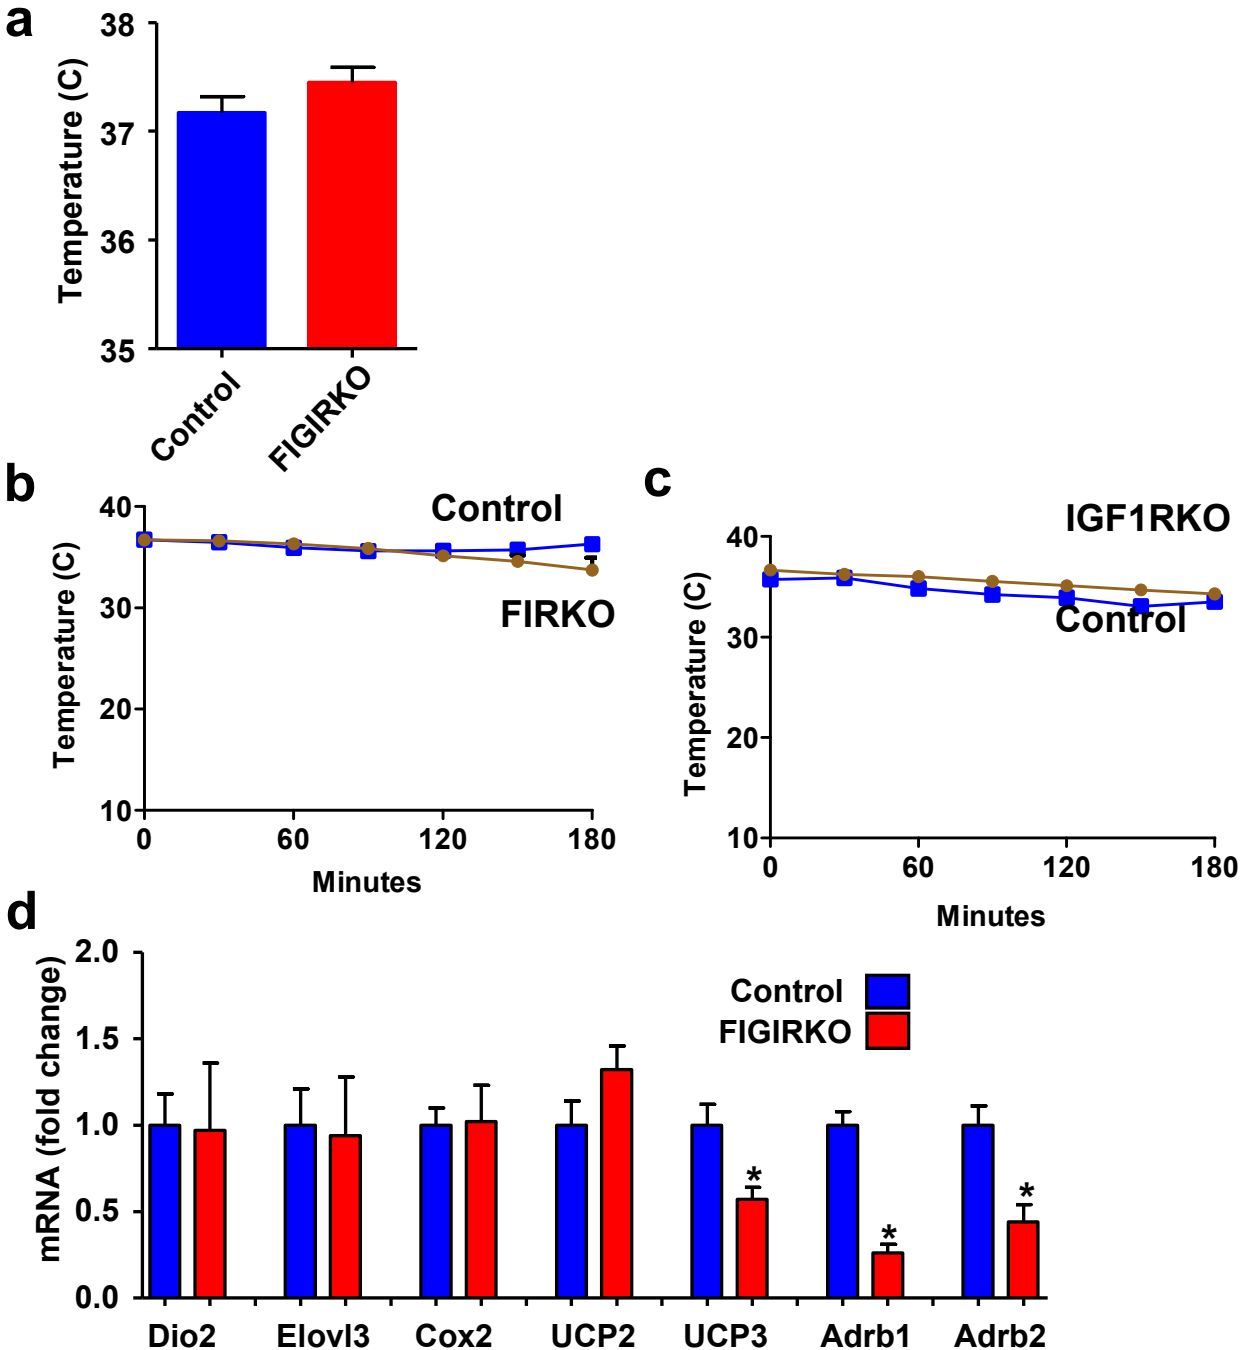

### Supplementary Figure S8: Cold exposure in fat specific IR or IGF1R KO mice and body temperature and mRNA abundance in BAT of control and FIGIRKO mice

(a) Rectal temperature was measured in 4 months old control and FIGIRKO male mice maintained at room temperature (n=10 per group).

(b) Rectal temperature was measured in 4 months old control and adipose specific IR KO (FIRKO) male mice or (c) in 4 months old control and adipose specific IGF1R KO male mice every 30 min for 3 hours after exposure to a 4°C environment (n=8 per group).

(c) mRNA abundance was measured by real time PCR in BAT from 4 months old male control and FIGIRKO mice. Results are mean  $\pm$  SEM of 6 animals/group.

Statistical significance assessed by two-tailed Student's t test, \*  $p < 0.05$  between control and FIGIRKO mice.



**Supplementary  
Figure S9**

**a**

**CL316243  
chronic treatment  
(daily for 2 weeks)**

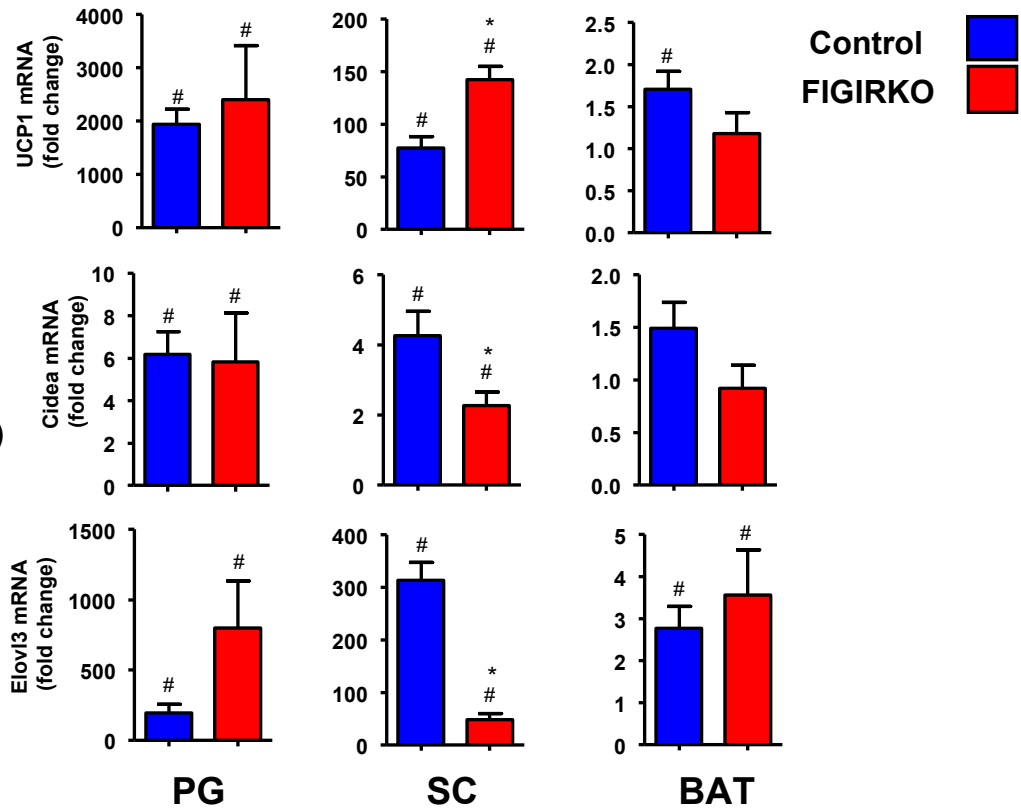

**b**

**CL316243 chronic treatment**

**Saline treated**

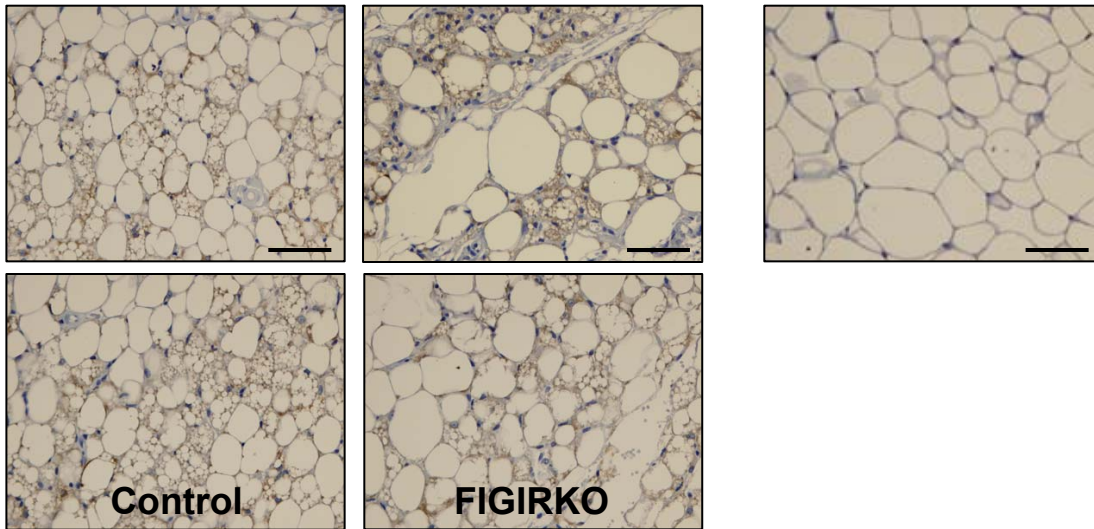

**Supplementary Figure S9: Appearance of systemic brown adipocytes in white adipose tissues of control and FIGIRKO mice chronically treated with CL316243**

(a) *UCP1*, *Cidea* and *Elovl3* mRNA abundance was measured by real time PCR in PG, SC and BAT in control and FIGIRKO mice injected daily with either saline or CL316243 (1  $\mu$ g/g body weight/day) intraperitoneally for 2 weeks. Results are mean  $\pm$  SEM of 5 animals/group and are expressed as fold change over the saline group.

Statistical significance assessed by two-tailed Student's t test, \*  $p < 0.05$  between control and FIGIRKO mice, #  $p < 0.05$  between saline and CL316243 treated group.

(b)  $\alpha$ -UCP1 immunohistochemistry staining of SC adipose tissues from control and FIGIRKO male mice injected daily with CL316243 (1  $\mu$ g/g body weight/day) for 2 weeks. Scale bar = 50  $\mu$ m.

# Supplementary Table S1

## Real time PCR primers

|                |    |                                |
|----------------|----|--------------------------------|
| IR             | FW | CCACCAATACGTCATTCAACAAC        |
|                | RV | GGGCAGATGTCACAGAATCAA          |
| IGF1R          | FW | AGGAGAAGCCCATGTGTGAG           |
|                | RV | GTGTTGTCGTCCGGTGTGT            |
| Leptin         | FW | GGG CTT CAC CCC ATT CTG A      |
|                | RV | TGG CTA TCT GCA GCA CAT TTT G  |
| Adiponectin    | FW | GATGGCACTCCTGGAGAGAA           |
|                | RV | TCTCCAGGCTCTCCTTTCCT           |
| Resistin       | FW | CTG TCC AGT CTA TCC TTG CAC AC |
|                | RV | CAG AAG GCA CAG CAG TCT TGA    |
| C/EBP $\alpha$ | FW | CAAGAACAGCAACGAGTACCG          |
|                | RV | GTCACTGGTCAACTCCAGCAC          |
| C/EBP $\beta$  | FW | CCAAGAAGACGGTGGACAA            |
|                | RV | CAAGTTCGCGAGGGTGCT             |
| C/EBP $\delta$ | FW | ATCGACTTCAGCGCCTACA            |
|                | RV | GCTTTGTGGTTGCTGTTGAA           |
| PPAR $\gamma$  | FW | TCAGCTCTGTGGACCTCTCC           |
|                | RV | ACCCTTGCATCCTTCACAAG           |
| aP2            | FW | GATGCCTTTGTGGGAACCT            |
|                | RV | CTGTCGTCTGCGGTGATTT            |
| FAS            | FW | GAGGACACTCAAGTGGCTGA           |
|                | RV | GTGAGGTTGCTGTCGTCTGT           |
| HSL            | FW | ACG GAT ACC GTA GTT TGG TGC    |
|                | RV | TCC AGA AGT GCA CAT CCA GGT    |
| ATGL           | FW | ACTGTGGCCTCATTCTCCT            |
|                | RV | AACTGGATGCTGGTGTGGT            |
| GLUT4          | FW | TGATTCTGCTGCCCTTCTGT           |
|                | RV | GGACATTGGACGCTCTCTCT           |
| Adrb1          | FW | CGTCCGTCGTCTCCTTCTAC           |
|                | RV | CGCAGCTGTCGATCTTCTTT           |
| Adrb2          | FW | GGAATTTTGGCAACTTCTGG           |
|                | RV | ACTCGGGCCTTATTCTTGGT           |
| Adrb3          | FW | GCT GAC TTG GTA GTG GGA CTC    |
|                | RV | TAG AAG GAG ACG GAG GAG GAG    |
| TNF $\alpha$   | FW | ACGTGGAAGTGGCAGAAGAG           |
|                | RV | GGCCATAGAACTGATGAGAGG          |
| MCP1           | FW | AGGTCCCTGTCATGATTCTG           |
|                | RV | GCTGCTGGTGATCCTCTTGT           |
| F4/80          | FW | TGGATGAGTGCTCCAGGAAT           |
|                | RV | GATGGCCAAGGATCTGAAAA           |

|                |    |                                   |
|----------------|----|-----------------------------------|
| Dio2           | FW | CAGTGTGGTGCACGTCTCCAATC           |
|                | RV | TGAACCAAAGTTGACCACCAG             |
| PGC-1 $\alpha$ | FW | CCCTGCCATTGTTAAGACC               |
|                | RV | TGCTGCTGTTCTGTTTTTC               |
| mtTFA          | FW | AGT TCC CAC GCT GGT AGT GT        |
|                | RV | GCG CAC ATC TCG ACC C             |
| Nrf1           | FW | CAG CAA CCC TGA TGG CAC CGT GTC G |
|                | RV | GGC CTC TGA TGC TTG CGT CGT CTG G |
| COX2           | FW | TCTCCCCTCTCTACGCATTCT             |
|                | RV | TCATTGGTGCCCTATGGTTT              |
| Elovl3         | FW | GGACTTAAGGCCCTTTTTGG              |
|                | RV | TTCCGCGTTCTCATGTAGGT              |
| PRDM16         | FW | ACATCCGTGTAGCGTGTTCC              |
|                | RV | GCACCAACAGTTCCTCTCCA              |
| CIDEA          | FW | ATCACAACTGGCCTGGTTACG             |
|                | RV | TACTACCCGGTGTCCATTTCT             |
| UCP1           | FW | CTGCCAGGACAGTACCCAAG              |
|                | RV | TCAGCTGTTCAAAGCACACA              |
| UCP2           | FW | CAGGTCACTGTGCCCTAACCA             |
|                | RV | CACTACGTTCCAGGATCCCAA             |
| UCP3           | FW | GACTATGGATGCCTACAGAACC            |
|                | RV | ACTCCAGCAACTTCTCCTTG              |
| TBP            | FW | ACCCTTCACCAATGACTCCTATG           |
|                | RV | TGACTGCAGCAAATCGCTTGG             |
